1 **Article Title:** Epidemiological model can forecast COVID-19 outbreaks from wastewater-based  
2 surveillance in rural communities.

3

4 **Running Title:** Forecasting outbreaks in rural communities

5

6 **Authors:**

7 Tyler Meadows<sup>1,3</sup>, Erik R. Coats<sup>2,3</sup>, Solana Narum<sup>2,4</sup>, Eva Top<sup>3,5,6</sup>, Benjamin J. Ridenhour<sup>3,7</sup>,

8 Thibault Stalder<sup>3,5,6,8</sup> \*

9

10 **Authors Affiliations:**

11 <sup>1</sup> Department of Mathematics and Statistics, Queen's University, Kingston, Ontario, Canada

12 <sup>2</sup> Department of Civil and Environmental Engineering, University of Idaho, Moscow, Idaho,

13 USA

14 <sup>3</sup> Institute for Modeling Collaboration and Innovation (IMCI), University of Idaho, Moscow,

15 Idaho, USA

16 <sup>4</sup> Bioinformatics and Computational Biology Graduate Program (BCB), Moscow, Idaho, USA

17 <sup>5</sup> Department of Biological Sciences, University of Idaho, Moscow, Idaho, USA

18 <sup>6</sup> Institute for Interdisciplinary Data Sciences (IIDS), University of Idaho, Moscow, Idaho, USA

19 <sup>7</sup> Department of Mathematics and Statistical Science, University of Idaho, Moscow, Idaho, USA

20 <sup>8</sup> INSERM, CHU Limoges, RESINFIT, U1092, Univ. Limoges, F-87000, Limoges, France

21 \* **Corresponding Author:** Centre de Biologie et de Recherche en Santé – CBRS – 3ème étage,  
22 UMR 1092 RESINFIT, 1 rue du Professeur Bernard Descottes, 87025 Limoges, France, Phone:  
23 +33 (0)5 19 56 42 60, email: [thibault.stalder@unilim.fr](mailto:thibault.stalder@unilim.fr)

24

25 **Keyword:** SARS-CoV-2, COVID-19, Wastewater-based epidemiology (WBE), SEIR, rural  
26 communities

27

## 28 **Abstract**

29 Wastewater can play a vital role in infectious disease surveillance, especially in underserved  
30 communities where it can reduce the equity gap to larger municipalities. However, using  
31 wastewater surveillance in a predictive manner remains a challenge. We tested if detecting  
32 SARS-CoV-2 in wastewater can predict outbreaks in rural communities. Under the CDC  
33 National Wastewater Surveillance program, we monitored several rural communities in Idaho  
34 (USA). While high daily variations in wastewater viral load made real-time interpretation  
35 difficult, a SEIR model could factor out the data noise and forecast the start of the Omicron  
36 outbreak in five of the six cities that were sampled soon after SARS-CoV-2 quantities increased  
37 in wastewater. For one city, the model could predict an outbreak 11 days before reported clinical  
38 cases began to increase. An epidemiological modeling approach can transform how  
39 epidemiologists use wastewater data to provide public health guidance on infectious diseases in  
40 rural communities.

41 **Main text**

42 **Introduction.**

43 Wastewater-based epidemiology (WBE) is a promising approach for broad-scale, agnostic  
44 surveillance of infectious diseases and antimicrobial resistance within and across communities.  
45 Indeed, many infectious agents such as SARS-CoV-2, poliovirus, RSV, and flu shed through  
46 stool (1,2), and potentially urine (3), and are thus detectable in wastewater (4,5). Additionally,  
47 WBE assesses infectious disease circulation in both symptomatic and asymptomatic populations.  
48 Most importantly, WBE can improve and accelerate the early detection of infectious disease  
49 outbreaks by public health authorities, providing actionable data for epidemiologists. However,  
50 barriers remain to how epidemiologists might use or interpret this data to inform public health in  
51 a predictive way rather than a retrospective approach. A modeling-based approach to wastewater  
52 data can provide the framework to interpret infectious disease spread and burden by estimating  
53 epidemiological parameters such as incidence (6), prevalence (7–9), or effective reproductive  
54 number (10).

55 WBE also presents a unique opportunity to support vulnerable and underserved communities  
56 (11). In particular, rural communities are at a higher risk of severe outcomes associated with  
57 certain infectious diseases due to demographic factors (e.g., age), underlying healthcare  
58 challenges (e.g. obesity, smoking), limited resources (12–15), or reduced risk perception (16).  
59 Moreover, as rural communities often lack the resources for broader-scale clinical testing, WBE  
60 can help sustain rural community health. Unfortunately, WBE has mainly focused on urban areas  
61 and larger cities, leaving rural communities with reduced access to this critical data (11,17–20).  
62 In that regard, WBE is a tool that promotes equity (21).

63 The COVID-19 pandemic provided a unique opportunity to leverage and expand WBE while  
64 concurrently establishing greater value for epidemiologists. Concentrations of SARS-CoV-2  
65 found in wastewater correlate well with the number of COVID-19 cases (22–24). Thus, with the  
66 right tools in place WBE can serve as an early warning for a potential COVID-19 outbreak  
67 (4,25–28). Perhaps more critically for epidemiologists, the utility of wastewater-based detection  
68 of SARS-CoV-2 has become even more significant with reduced COVID-19 clinical testing due  
69 to home tests and general lack of clinical reporting (29). However, there remains a gap in  
70 translating WBE data in a timely manner for use by public health officials. Moreover, a primary  
71 obstacle for epidemiologists is the variability and uncertainty inherent in wastewater monitoring  
72 (30,31).

73 Modeling SARS-CoV-2 wastewater data represents an opportunity to bridge the information  
74 gap with epidemiologists while bringing enhanced and timely health monitoring to rural  
75 communities. Here we present and discuss a susceptible-exposed-infectious-recovered (SEIR)  
76 epidemiological model developed based on wastewater detection of SARS-CoV-2 for  
77 epidemiological surveillance of COVID-19 in rural area. We specifically tested the hypothesis  
78 that the detection and quantification of SARS-CoV-2 in wastewater forecasts the start of an  
79 outbreak in rural communities.

80

## 81 **Material & Methods.**

### 82 **Sites and sample collection**

83 Wastewater samples were collected from wastewater treatment facilities (WWTFs) located in  
84 five rural communities serving approximately 1,000 or less inhabitants and a small city in a rural

85 county in Idaho, USA (Table 1). These rural communities are defined as "rural" according to the  
86 2020 U.S. Census Bureau. The county itself falls under the category of a "rural" or  
87 "nonmetropolitan" county, as classified by the U.S. Office of Management and Budget. Rural  
88 cities are abbreviated RC1 to RC5 and the small city SC. All WWTFs primarily treat domestic  
89 wastewater; the SC WWTF also receives effluent from a regional hospital.

90 Samples were collected three times a week from October 2021 to March 2022. Rural WWTF  
91 samples were time-composite samples collected using Teledyne ISCO 3700 Full Size Portable  
92 Sampler (Teledyne ISCO, Lincoln, NE, USA) autosamplers or homemade autosamplers  
93 constituted of a Sci-Q 323 peristaltic pump (Watson-Marlow, Falmouth, UK) controlled by an  
94 Omron H3CR timer (Omron Corporation, Kyoto, Japan) and housed in a cooler box. Sampling  
95 frequencies were comprised between 10 and 30 minutes for 24h. Approximately 3L of  
96 wastewater was collected, and subsamples were collected at the end of the 24h sampling period  
97 and transported within 6h to the laboratory, where samples were kept at 4°C until further  
98 processing. Samples from the SC WWTF were collected using a Teledyne ISCO model 3700  
99 autosampler (Teledyne ISCO, Lincoln, NE, USA), with samples collected paced with influent  
100 flow. Sampling failed for less than 10% of the total samples sampled. Samples were kept at 4°C  
101 until further processed, at most 3 days later.

102 Confirmed COVID-19 case counts per zip code were obtained from the Idaho Public Health  
103 District 2 website (<https://idahopublichealth.com/district-2/novel-coronavirus>).

#### 104 **Sample processing for SARS-CoV-2 detection and quantification.**

105 The detailed protocols presented below are publicly available on protocol.io (32). In brief,  
106 before concentrating the viral fraction of two replicate wastewater fractions through  
107 electronegative membrane filtration, each sample was spiked with the Bovilis® Coronavirus

108 (BCoV) (Merck, Kenilworth, NJ, USA) as a process internal control. Subsequently, filters were  
109 inserted together with the DNA/RNA Shield™ (Zymo Research, Irvine, CA, USA) into the Lysis  
110 Bead tubes from the AllPrep® PowerViral® DNA/RNA Kit (QIAGEN, Inc., Germantown, MD,  
111 USA). Lysis was performed on a FastPrep™ (MP Biomedicals, Santa Ana, CA, USA) for 4  
112 cycles of 20 seconds each at 4.5 m/s and the RNA was then extracted as per the kit  
113 manufacturer's protocol on a QIAcube Connect automated extraction instrument (QIAGEN, Inc.,  
114 Germantown, MD, USA).

115 SARS-CoV-2 was quantified by dPCR using the QIAcuity Digital PCR System (QIAGEN,  
116 Inc., Germantown, MD, USA) using the GT-Digital SARS-CoV-2 Wastewater Surveillance  
117 Assay For QIAcuity® (GT Molecular, Fort Collins, CO, USA). Each 40 µl reaction contained 1x  
118 of the Qiagen QIAcuity One-Step Viral RT-PCR Kit (QIAGEN, Inc., Germantown, MD, USA),  
119 1x of the GT Molecular N1-N2-BCoV Assay Solution, and 20 µl RNA template. RNA extraction  
120 blanks, dPCR non-template controls and positive controls were included in each dPCR run.

## 121 **Data processing and analysis**

122 Fluorescent thresholds were manually set based on the fluorescent level of the positive  
123 controls. Then we excluded data from samples for which (i) the recovery rate of the internal  
124 processing control BCoV was lower than 1%, or (ii) the RNA extraction process control or dPCR  
125 negative control were positive and more than 10% of the measured sample concentration.

126 The date of an outbreak's start was determined with a piecewise regression model using  
127 either the cumulative sum of the copies per day of the N1 target or the cumulative sum of  
128 COVID-19 clinically confirmed cases to estimate the breakpoint in a linear dataset. For each  
129 city, we subsampled the linear data around the inflection points corresponding to the dates of the  
130 main surge of N1 copies or COVID-19 reported cases in early 2022. Then we fitted a linear

131 regression model in R using the “lm” function with cumulative copies of cases as the response  
132 (Y) and the date as the predictor (X). Finally, we fitted the piecewise regression model to the  
133 original model, estimating a breakpoint around the inflection of the line, using the segmented()  
134 function from the segmented package in R (33).

### 135 *SARS-CoV-2 Epidemiological Model.*

136 We constructed a compartmental model to approximate the dynamics of the epidemic in each  
137 city. Due to the small size of populations in the rural areas, we expected stochastic effects to be  
138 important, and opted to use a discrete-time discrete-state Markov process to approximate the  
139 spread of the disease. In this model, individuals in the population can be in one of four states:  
140 susceptible ( $S$ ), exposed ( $E$ ), infectious ( $I$ ), and removed ( $R$ ). Importantly, in this model exposed  
141 individuals have contracted the disease and shed the virus but are not yet infectious. The changes  
142 in the compartments are assumed to be binomially distributed:  $X_t \sim \text{Bin}\left(S(t), \frac{\beta I(t)}{N(t)}\right)$  is the  
143 number of newly exposed individuals on day  $t$ ,  $Y_t \sim \text{Bin}\left(E(t), \frac{1}{\tau}\right)$  is the number of newly  
144 infectious individuals on day  $t$ , and  $Z_t \sim \text{Bin}\left(I(t), \frac{1}{\delta}\right)$  is the number of newly recovered  
145 individuals on day  $t$ . The parameter  $\beta$  is the transmission rate,  $\tau$  is the mean incubation period,  
146 and  $\delta$  is the mean infectious period, and  $N(t) = S(t) + E(t) + I(t) + R(t)$  is the total  
147 population at time  $t$ . The discrete-time Markov process is given by:

148

$$149 \quad (1a) \quad \Delta S(t) = -X_t,$$

$$150 \quad (1b) \quad \Delta E(t) = X_t - Y_t,$$

$$151 \quad (1c) \quad \Delta I(t) = Y_t - Z_t,$$

152 (1d)  $\Delta R(t) = Z_t.$

153

154 The number of virus particles shed by exposed individuals was assumed to be log-normally  
155 distributed (34). However, the log-normal distribution is difficult to work with mathematically,  
156 so we approximated the log-normal distribution using the Gamma distribution by matching the  
157 first two moments. For simplicity, we assumed that only the individuals in the exposed class  
158  $E(t)$  shed virus in the stools. This assumption is reasonable since it has been shown that the  
159 amount of virus shed by a single individual is time-varying, with a peak occurring around  
160 symptoms onset (35,36). If there are  $E(t)$  exposed individuals, the amount of virus in the  
161 wastewater is a random variable  $V(t)$  with probability density function:

162

163 (2)  $\Phi(V; k, \theta, E) = \gamma(V; Ek, \theta),$

164 where  $\gamma(V; k, \theta)$  is the probability density function for the gamma distribution with rate  $k = \frac{E_v^2}{V_v}$

165 and scale  $\theta = \frac{V_v}{E_v}$ . See Table 2 for parameter values.

166 We used a sequential Monte Carlo (particle filter) method to fit the collected wastewater data  
167 to the stochastic model to the collected wastewater data (Figure 1). In simulations, 50,000  
168 particles (initial conditions) were sampled, using the normalized likelihood distribution for the  
169 initial concentrations of virus measured in the wastewater to determine the number of exposed  
170 individuals (Figure 1 top row). The initial states of the other classes were sampled uniformly  
171 from the remaining population.



172 Each time step, every particle evolved according to the Markov process in equation 1 (Figure  
173 1 bottom left). On days that we have collected wastewater data, the particles were weighted  
174 according to their likelihood (Figure 1 bottom center) and resampled using a systematic sampling  
175 method to filter out the least likely particles and reinforce the most likely particles (Figure 1  
176 bottom right).

177 Data and scripts of this study are available on [https://github.com/Tyler-Meadows/wastewater-](https://github.com/Tyler-Meadows/wastewater-surveillance)  
178 [surveillance](https://github.com/Tyler-Meadows/wastewater-surveillance).

179

## 180 **Results.**

### 181 **Dynamics of SARS-CoV-2 in rural wastewater vs. clinically confirmed cases.**

182 For the period investigated, clinically reported cases revealed that the cities experienced one  
183 or two COVID-19 outbreaks, as shown in Figure 2. The first outbreak occurred in late October  
184 2021, but it was not detected in all cities and was relatively small compared to the second  
185 outbreak experienced by all cities in early January 2022. This second surge was driven by the  
186 Omicron variant, which emerged in the United States in early December 2021 (37).

187 Examining the collected wastewater data, 293 samples were retained following data  
188 processing, with each WWTF yielding 44-58 measurements over a five-month period. The daily  
189 load of SARS-CoV-2 present in wastewater varied greatly day-to-day, making interpretation of  
190 the real-time spread of COVID-19 challenging. Interestingly, the variability in the order of  
191 magnitude tended to be larger as the city population decreased, indicating a greater level of  
192 randomness (as shown in Figure 3). Additionally, the difference in variance of daily SARS-CoV-  
193 2 quantities between cities was significant, as confirmed statistically using Brown-Forsythe,

194 Levene, Barlett, and Klinger-Killeen tests (test results provided in the Supplementary Material).  
195 These results suggest that the fluctuations in daily SARS-CoV-2 measurements in smaller cities  
196 are more stochastic than in larger cities.

197 Despite this stochasticity, the Omicron outbreaks resulted in a sharp increase of quantities of  
198 the virus collected at the WWTFs above the background levels (Figure 2) by 7- to 81-fold. After  
199 estimating the date of the outbreak start (vertical dashed line in Figure 2), we estimated that the  
200 SARS-CoV-2 wastewater signal tends to lead the clinically confirmed COVID-19 cases by 0 to  
201 10 days. This supports other retrospective observations, mostly performed in larger cities, that  
202 wastewater surveillance could improve and even accelerate the early detection of infectious  
203 diseases in rural communities (36,38,39). However, the lead times were variable, and in one  
204 case, the wastewater signal was not inferred to precede the clinically reported case data. Other  
205 studies have also observed cases where wastewater signal was not preceding clinical testing  
206 (38,40).

207

## 208 **Epidemiological model to forecast a COVID-19 outbreak from wastewater detection of the** 209 **SARS-CoV-2.**

210 We used an SEIR-based model (Figure 4A) to investigate whether wastewater-based  
211 surveillance of SARS-CoV-2 could enhance the prediction of a COVID-19 outbreak. To test the  
212 model's ability to forecast upcoming trend of cases, we determined if the model could have  
213 predicted the Omicron outbreak using exclusively wastewater data. Specifically, we fit the  
214 predicted cases using the wastewater measurements up to the onset of the outbreak. This  
215 corresponded to the first measurement performed two days after the inflection point defining the  
216 start of the outbreak using wastewater data. Then we let the model forecast the upcoming trend

217 in active cases (Figure 4B). When comparing the forecasted COVID-19 cases with the clinically  
218 confirmed cases we found that the model successfully captured the clinically active cases in five  
219 of the six cities. For the rural cities, the forecasts were within the 95% confidence interval at  
220 least up to eight days ahead; corresponding to R4 (Figure 4). While the number of predicted  
221 cases tended to be lower than the number of the clinically confirmed cases reported, they were  
222 following them closely in two rural cities and in the small city. For those two rural cities (sites  
223 R1 and R2), the model accurately predicted the number of active cases more than 14 days ahead.  
224 In city SC, the model was able to forecast the number of active cases accurately more than eight  
225 days ahead. These results show that in the majority of sewersheds surveyed the model would  
226 have confidently predicted the outbreaks even before the COVID-19 reported cases started to  
227 increase. Anticipation of the model on the COVID-19 reported cases ranged from 0 days for R5  
228 to 11 days for R2 (see blue dashed line on Figure 4).

229 Since our objective was primarily to test if a SEIR model could predict an outbreak occurring  
230 in rural communities, we then focused on the capacity of the model to predict an increase in the  
231 trend of active cases. To that end, we used a simulated wastewater dataset to count the number of  
232 times the model predicted upward or downward trends in cases correctly (i.e., true positive rate)  
233 or incorrectly (i.e., false positive rate). We varied the threshold used to accept predictions to  
234 create receiver operating characteristic (ROC) curves (Figure 5). Measured area under the curve  
235 (AUC) values presented in Figure 6 reflect the sensitivity and specificity of the forecast for a  
236 range of forecasted days. The model tends to predict trends better as the forecast range increases.  
237 The ROC curves for predictions made less than a week in advance were significantly lower than  
238 those made over nine days (p-values presented in Supplementary Material). After nine days, the

239 AUC medians were above 0.7, and increased to 0.75 at 15 days. These results suggest  
240 epidemiologists could rely on these 9 to 15-day forecasts.

241

## 242 **Discussion**

243 Wastewater-based detection of SARS-CoV-2 has been primarily focused on large urban and  
244 metropolitan areas and much less on rural towns. Here we address this gap by having conducted  
245 a surveillance effort of the SARS-CoV-2 in the wastewaters of several rural cities of the state of  
246 Idaho (USA) since October 2021. Below we discuss the barriers associated with WBE in rural  
247 areas and how SEIR modeling could help overcome some of these challenges by forecasting  
248 trends in COVID-19 cases based on wastewater-based measurements.

249 While epidemiologists can examine wastewater data side-by-side with clinical testing to help  
250 understand what is happening, many infectious diseases are not reportable, or in the case of  
251 COVID-19, at-home self-testing replaced clinical testing (41). For example, influenza and  
252 COVID-19 are not reportable diseases in Idaho (USA). Thus, epidemiologists are left with few  
253 tools to help them characterize epidemiological trends and forecasts; ultimately only wastewater  
254 data may be available to provide insight into disease burden in rural areas.

255 However, as we experienced, the variability in viral quantities arriving at the rural WWTF  
256 per day made the determination of the start of the outbreak in real-time difficult without  
257 retrospective statistical analysis. As we observed, the variability in the order of magnitude tended  
258 to be larger as the rural sewershed size decreased (42), making interpretation of wastewater-  
259 based detection of infectious diseases in rural areas even more complicated for public health.

260 This noise is typically lower in larger sewersheds that are more active over a 24-hr time  
261 compared to smaller ones (43).

262 SEIR epidemiological models offer a framework for epidemiologists to analyze the dynamics  
263 of outbreaks using wastewater data (7,8,44–48). Specifically, in our study, we demonstrate that  
264 our SEIR model can provide reliable forecasts of when case numbers are trending upwards in  
265 rural communities. Sensitivity and specificity assessments of the model in predicting start of the  
266 outbreak revealed that the forecasts were more reliable when looking at trends beyond a week,  
267 with the best forecast being over a period of nine to 15 days. Similar ranges of short-term  
268 forecasts of seven to nine days to predict upcoming cases based on wastewater detection of the  
269 SARS-CoV-2 were reported for larger cities using SEIR or SEIR-like approaches (8,46,48). The  
270 fact that the model was not performing well under 9 days may, in part, be attributed to the noise  
271 of the SARS-CoV-2 quantities in rural wastewater that creates a sawtooth pattern in the trend.  
272 Thus, while the trend over a week goes up, there is a chance that some of the points between  
273 went down. This led us to hypothesize that the noise in the wastewater data may have made  
274 short-term trend predictions less accurate.

275 While our SEIR model functions well to provide advanced warning of a COVID-19  
276 outbreak, it failed to predict the outbreak peak (Fig. S1) and we could not assess the accuracy of  
277 case number predictions. Predicted cases tended to be lower than reported clinical cases for the  
278 area, contrasting with other studies on larger sewersheds that have shown that SEIR models  
279 typically estimate more COVID-19 cases than the reported number (45,53,54). The  
280 underestimation of COVID-19 cases observed in this study may be attributed, in part, to  
281 differences between the population of the city sampled and the zip code used (Table 1); the latter  
282 corresponds to the clinically recorded cases. When comparing city with zip code census, 39 to

283 71% of the residents of rural zip codes were not connected to the sewer system of the cities. In  
284 rural areas, zip codes often cover a larger geographical area beyond the city limits, which means  
285 that comparisons between wastewater data and reported cases should be approached with  
286 caution. It is important to note that we did not intend to use the model to predict case numbers;  
287 the study was not designed for this purpose. Instead, it was intended to forecast an increase in  
288 COVID-19 cases to provide an early warning that could be shared with the community.

289 Despite the successful application of SEIR models to wastewater surveillance of the SARS-  
290 CoV-2, there are some uncertainties on how to connect the model with wastewater data. Some  
291 authors have included the cumulative virus titer in the sewershed as a dynamic variable (8) or as  
292 a linear combination of other dynamic variables (45). However, this approach can be problematic  
293 when measurements are sparse or there are gaps between collection periods – which would be  
294 very common in rural WWTFs. Most authors directly connect wastewater measurements to the  
295 incidence rate, or prevalence, similar to what we have done herein. In addition, the connection  
296 between the disease compartments (the exposed ‘E’ and infected ‘I’ compartments) in the SEIR  
297 model and wastewater measurements is not well established. Contribution to viral load in  
298 wastewater can tie to the individuals in the ‘I’ compartment (7,8,45) or to the ‘E’ compartment;  
299 the SEIR model in this study resulted in better predictions than when connected to ‘I’. This  
300 difference could be attributed to the fact that peak virus shedding in stool may occur for a few  
301 days around the onset of symptoms (35,36). This means that individuals contributing to the load  
302 of SARS-CoV-2 measured in wastewater may be at the transition between ‘E’ and ‘I’  
303 compartments in the SEIR model. Some researchers have incorporated the results from  
304 wastewater measurement in both ‘E’ and ‘I’ (44) while others created a new compartment  
305 structure to account for viral shedding dynamic in wastewater (47,48).

306 Finally, our model was able to successfully forecast the upcoming cases in most of the cities  
307 surveyed. In one city this resulted in predicting the outbreak as much as 11 days before reported  
308 clinical cases started to increase. However, it failed for one city, suggesting that the disease  
309 dynamics do not always follow the model assumptions. This may be because the model does not  
310 include potential traveling between cities, which may impact the accuracy of predictions,  
311 especially in rural areas where residents often have to commute to work. In the rural cities  
312 surveyed between 79.4 and 94.5% of residents work outside their place of residence, versus  
313 27.3% in the small city surveyed (data from U.S. Census Bureau Topic: Commuting – Survey:  
314 American Community Survey – 2021, ACS 5-Year Estimates Subject Tables).

315 In conclusion, our study reveals that wastewater-based epidemiology (WBE) in rural  
316 communities and small sewersheds in general is associated with high daily variation in SARS-  
317 CoV-2 levels. This variation creates a challenge for epidemiologists who seek to monitor real-  
318 time data in rural areas based solely on the raw data. However, our research also shows that the  
319 SEIR modeling approach can help to decipher this data and actually predict the start of  
320 outbreaks. Our model provides a suitable framework for epidemiologists to analyze the dynamics  
321 of outbreaks using wastewater data.

322

### 323 **Acknowledgment**

324 Research reported in this publication was supported by the National Institute of General  
325 Medical Sciences of the National Institutes of Health under Award Number P20GM104420. The  
326 content is solely the responsibility of the authors and does not necessarily represent the official  
327 views of the National Institutes of Health. Data collection for this study was also made possible  
328 thanks to the State of Idaho Department of Health and Welfare under grant ## NU50CK000544

329 funded by the Center for Disease Control and Prevention (CDC) through the Epidemiology and  
330 Laboratory Capacity Enhancing Detection Through Coronavirus Release and Relief (CRR)  
331 Supplement Funds. The content of this project is solely the responsibility of the authors and does  
332 not necessarily represent the official views of the State of Idaho Department of Health and  
333 Welfare or the Center for Disease Control and Prevention (CDC).

334

### 335 **References**

- 336 1. Parasa S, Desai M, Chandrasekar VT, Patel HK, Kennedy KF, Roesch T, et al. Prevalence of  
337 gastrointestinal symptoms and fecal viral shedding in patients with coronavirus disease 2019:  
338 A systematic review and meta-analysis. *JAMA Netw Open*. 2020 Jun 1;3(6):e2011335–  
339 e2011335.
- 340 2. Arts PJ, Kelly JD, Midgley CM, Anglin K, Lu S, Abedi GR, et al. Longitudinal and  
341 quantitative fecal shedding dynamics of SARS-CoV-2, pepper mild mottle virus, and  
342 crAssphage. *mSphere*. 2023 Jun 20;0(0):e00132-23.
- 343 3. Jeong HW, Kim SM, Kim HS, Kim YI, Kim JH, Cho JY, et al. Viable SARS-CoV-2 in  
344 various specimens from COVID-19 patients. *Clin Microbiol Infect*. 2020 Nov;26(11):1520–  
345 4.
- 346 4. Shah S, Gwee SXW, Ng JQX, Lau N, Koh J, Pang J. Wastewater surveillance to infer  
347 COVID-19 transmission: A systematic review. *Sci Total Environ*. 2022 Jan 15;804:150060.



- 348 5. Corpuz MVA, Buonerba A, Vigliotta G, Zarra T, Ballesteros F, Campiglia P, et al. Viruses in  
349 wastewater: occurrence, abundance and detection methods. *Sci Total Environ.* 2020 Nov  
350 25;745:140910.
- 351 6. McManus O, Christiansen LE, Nauta M, Krogsgaard LW, Bahrenscheer NS, Kappelgaard L  
352 von, et al. Predicting COVID-19 incidence using wastewater surveillance data, Denmark,  
353 October 2021–June 2022. *Emerg Infect Dis.* 2023 Aug;29(8):1589–97.
- 354 7. McMahan CS, Self S, Rennert L, Kalbaugh C, Kriebel D, Graves D, et al. COVID-19  
355 wastewater epidemiology: a model to estimate infected populations. *Lancet Planet Health.*  
356 2021 Dec 1;5(12):e874–81.
- 357 8. Phan T, Brozak S, Pell B, Gitter A, Xiao A, Mena KD, et al. A simple SEIR-V model to  
358 estimate COVID-19 prevalence and predict SARS-CoV-2 transmission using wastewater-  
359 based surveillance data. *Sci Total Environ.* 2023 Jan 20;857:159326.
- 360 9. Layton BA, Kaya D, Kelly C, Williamson KJ, Alegre D, Bachhuber SM, et al. Evaluation of a  
361 wastewater-based epidemiological approach to estimate the prevalence of SARS-CoV-2  
362 infections and the detection of viral variants in disparate Oregon communities at city and  
363 neighborhood scales. *Environ Health Perspect.* 2022 Jun 29;130(6):067010.
- 364 10. Huisman JS, Scire J, Caduff L, Fernandez-Cassi X, Ganesanandamoorthy P, Kull A, et al.  
365 Wastewater-based estimation of the effective reproductive number of SARS-CoV-2. *Environ*  
366 *Health Perspect.* 2022 May;130(5):057011.

- 367 11. Holm RH, Osborne Jelks N, Schneider R, Smith T. Beyond COVID-19: designing inclusive  
368 public health surveillance by including wastewater monitoring. *Health Equity*. 2023  
369 Jun;7(1):377–9.
- 370 12. Lakhani HV, Pillai SS, Zehra M, Sharma I, Sodhi K. Systematic review of clinical insights  
371 into novel coronavirus (CoVID-19) pandemic: persisting challenges in U.S. rural population.  
372 *Int J Environ Res Public Health*. 2020 Jun 15;17(12):4279.
- 373 13. Kaufman BG, Whitaker R, Pink G, Holmes GM. Half of rural residents at high risk of  
374 serious illness due to COVID-19, creating stress on rural hospitals. *J Rural Health*. 2020 Jun  
375 30;36(4):584–90.
- 376 14. Cuadros DF, Branscum AJ, Mukandavire Z, Miller FD, MacKinnon N. Dynamics of the  
377 COVID-19 epidemic in urban and rural areas in the United States. *Ann Epidemiol*. 2021  
378 Jul;59:16–20.
- 379 15. Cromartie J, Dobis, Elizabeth A., Krumel, Thomas P., McGranahan, David, Pender, John.  
380 *Rural America at a glance: 2020 edition*. United States Department of Agriculture Economic  
381 Research Service: Economic Information Bulletin. 2020 Dec;221:6.
- 382 16. Ridenhour BJ, Sarathchandra D, Seamon E, Brown H, Leung FY, Johnson-Leon M, et al.  
383 Effects of trust, risk perception, and health behavior on COVID-19 disease burden: Evidence  
384 from a multi-state US survey. *PLoS One*. 2022 May 20;17(5):e0268302.
- 385 17. Conway MJ, Kado S, Kooienga BK, Sarette JS, Kirby MH, Marten AD, et al. SARS-CoV-2  
386 wastewater monitoring in rural and small metropolitan communities in Central Michigan. *Sci*  
387 *Total Environ*. 2023 Oct 10;894:165013.

- 388 18. D'Aoust PM, Towhid ST, Mercier É, Hegazy N, Tian X, Bhatnagar K, et al. COVID-19  
389 wastewater surveillance in rural communities: Comparison of lagoon and pumping station  
390 samples. *Sci Total Environ*. 2021 Dec 20;801:149618.
- 391 19. Toledo DM, Robbins AA, Gallagher TL, Hershberger KC, Barney RE, Salmela SM, et al.  
392 Wastewater-based SARS-CoV-2 surveillance in Northern New England. *Microbiol Spectr*.  
393 2022 Apr 27;10(2):e0220721.
- 394 20. Jarvie MM, Reed-Lukomski M, Southwell B, Wright D, Nguyen TNT. Monitoring of  
395 COVID-19 in wastewater across the Eastern Upper Peninsula of Michigan. *Environ Adv*.  
396 2023 Apr;11:100326.
- 397 21. Medina CY, Kadonsky KF, Roman FA, Tariqi AQ, Sinclair RG, D'Aoust PM, et al. The  
398 need of an environmental justice approach for wastewater based epidemiology for rural and  
399 disadvantaged communities: A review in California. *Curr Opin Environ Sci Health*. 2022  
400 Jun;27:100348.
- 401 22. Wurtzer S, Marechal V, Mouchel JM, Maday Y, Teyssou R, Richard E, et al. Evaluation of  
402 lockdown effect on SARS-CoV-2 dynamics through viral genome quantification in waste  
403 water, Greater Paris, France, 5 March to 23 April 2020. *Euro Surveill*. 2020 Dec  
404 17;25(50):2000776.
- 405 23. Peccia J, Zulli A, Brackney DE, Grubaugh ND, Kaplan EH, Casanovas-Massana A, et al.  
406 Measurement of SARS-CoV-2 RNA in wastewater tracks community infection dynamics.  
407 *Nat Biotech*. 2020 Oct;38(10):1164–7.

- 408 24. Fernandez-Cassi X, Scheidegger A, Bänziger C, Cariti F, Tuñas Corzon A,  
409 Ganesanandamoorthy P, et al. Wastewater monitoring outperforms case numbers as a tool to  
410 track COVID-19 incidence dynamics when test positivity rates are high. *Water Res.* 2021 Jul  
411 15;200:117252.
- 412 25. Bivins A, North D, Ahmad A, Ahmed W, Alm E, Been F, et al. Wastewater-based  
413 epidemiology: Global collaborative to maximize contributions in the fight against COVID-  
414 19. *Environ Sci Technol.* 2020 Apr 12;
- 415 26. Weidhaas J, Aanderud ZT, Roper DK, VanDerslice J, Gaddis EB, Ostermiller J, et al.  
416 Correlation of SARS-CoV-2 RNA in wastewater with COVID-19 disease burden in  
417 sewersheds. *Sci Total Environ.* 2021 Jun 25;775:145790.
- 418 27. Li L, Mazurowski L, Dewan A, Carine M, Haak L, Guarin TC, et al. Longitudinal  
419 monitoring of SARS-CoV-2 in wastewater using viral genetic markers and the estimation of  
420 unconfirmed COVID-19 cases. *Sci Total Environ.* 2022 Apr 15;817:152958.
- 421 28. Wu F, Xiao A, Zhang J, Moniz K, Endo N, Armas F, et al. Wastewater surveillance of  
422 SARS-CoV-2 across 40 U.S. states from February to June 2020. *Water Res.* 2021 Sep  
423 1;202:117400.
- 424 29. Fontenele RS, Yang Y, Driver EM, Magge A, Kraberger S, Custer JM, et al. Wastewater  
425 surveillance uncovers regional diversity and dynamics of SARS-CoV-2 variants across nine  
426 states in the USA. *Sci Total Environ.* 2023 Jun 15;877:162862.

- 427 30. Diamond MB, Keshaviah A, Bento AI, Conroy-Ben O, Driver EM, Ensor KB, et al.  
428 Wastewater surveillance of pathogens can inform public health responses. *Nat Med*. 2022  
429 Oct;28(10):1992–5.
- 430 31. McClary-Gutierrez JS, Mattioli MC, Marcenac P, Silverman AI, Boehm AB, Bibby K, et al.  
431 SARS-CoV-2 wastewater surveillance for public health action. *Emerg Infect Dis*. 2021  
432 Sep;27(9):e210753.
- 433 32. Narum S, Stalder T, Coats E, Top E. Quantification of the SARS-CoV-2 using  
434 electronegative membrane filtration and dPCR. *Protocols.io* [Internet]. 2022 Mar 28 [cited  
435 2023 Apr 18]; Available from: [https://www.protocols.io/view/quantification-of-the-sars-cov-](https://www.protocols.io/view/quantification-of-the-sars-cov-2-using-electronega-b6udres6)  
436 [2-using-electronega-b6udres6](https://www.protocols.io/view/quantification-of-the-sars-cov-2-using-electronega-b6udres6)
- 437 33. Muggeo VM, Atkins DC, Gallop RJ, Dimidjian S. Segmented mixed models with random  
438 changepoints: a maximum likelihood approach with application to treatment for depression  
439 study. *Stat Modelling*. 2014 Aug 1;14(4):293–313.
- 440 34. Miura F, Kitajima M, Omori R. Duration of SARS-CoV-2 viral shedding in faeces as a  
441 parameter for wastewater-based epidemiology: Re-analysis of patient data using a shedding  
442 dynamics model. *Sci Total Environ*. 2021 May 15;769:144549.
- 443 35. Puhach O, Meyer B, Eckerle I. SARS-CoV-2 viral load and shedding kinetics. *Nat Rev*  
444 *Microbiol*. 2023 Mar;21(3):147–61.
- 445 36. Wu F, Xiao A, Zhang J, Moniz K, Endo N, Armas F, et al. SARS-CoV-2 RNA  
446 concentrations in wastewater foreshadow dynamics and clinical presentation of new COVID-  
447 19 cases. *Sci Total Environ*. 2022 Jan 20;805:150121.

- 448 37. CDC COVID-19 Response Team. SARS-CoV-2 B.1.1.529 (Omicron) Variant — United  
449 States, December 1–8, 2021. *MMWR Morb Mortal Wkly Rep.* 2021 Dec;70.
- 450 38. Feng S, Roguet A, McClary-Gutierrez JS, Newton RJ, Kloczko N, Meiman JG, et al.  
451 Evaluation of sampling, analysis, and normalization methods for SARS-CoV-2  
452 concentrations in wastewater to assess COVID-19 burdens in Wisconsin communities. *ACS*  
453 *EST Water.* 2021 Aug 13;1(8):1955–65.
- 454 39. Graham KE, Loeb SK, Wolfe MK, Catoe D, Sinnott-Armstrong N, Kim S, et al. SARS-CoV-  
455 2 RNA in wastewater settled solids is associated with COVID-19 cases in a large urban  
456 sewershed. *Environ Sci Technol.* 2021 Jan 5;55(1):488–98.
- 457 40. Xiao A, Wu F, Bushman M, Zhang J, Imakaev M, Chai PR, et al. Metrics to relate COVID-  
458 19 wastewater data to clinical testing dynamics. *Water Res.* 2022 Apr 1;212:118070.
- 459 41. Park S, Marcus GM, Olgin JE, Carton T, Hamad R, Pletcher MJ, et al. Unreported SARS-  
460 CoV-2 home testing and test positivity. *JAMA Netw Open.* 2023 Jan 25;6(1):e2252684.
- 461 42. Schill R, Nelson KL, Harris-Lovett S, Kantor RS. The dynamic relationship between  
462 COVID-19 cases and SARS-CoV-2 wastewater concentrations across time and space:  
463 Considerations for model training data sets. *Sci Total Environ.* 2023 May 1;871:162069.
- 464 43. Tchobanoglous G, Stensel DH, Tsuchihashi R, Burton F, Abu-Orf M, Bowden G, et al.,  
465 editors. *Wastewater engineering: treatment and resource recovery.* Fifth edition. New York:  
466 McGraw-Hill Education; 2014. 2018 p.

- 467 44. Fazli M, Sklar S, Porter MD, French BA, Shakeri H. Wastewater-based epidemiological  
468 modeling for continuous surveillance of COVID-19 outbreak. In: 2021 IEEE International  
469 Conference on Big Data (Big Data). 2021. p. 4342–9.
- 470 45. Nourbakhsh S, Fazil A, Li M, Mangat CS, Peterson SW, Daigle J, et al. A wastewater-based  
471 epidemic model for SARS-CoV-2 with application to three Canadian cities. *Epidemics*. 2022  
472 Jun 1;39:100560.
- 473 46. Pájaro M, Fajar NM, Alonso AA, Otero-Muras I. Stochastic SIR model predicts the  
474 evolution of COVID-19 epidemics from public health and wastewater data in small and  
475 medium-sized municipalities: A one year study. *Chaos Solitons Fractals*. 2022  
476 Nov;164:112671.
- 477 47. Polcz P, Tornai K, Juhász J, Cserey G, Surján G, Pándics T, et al. Wastewater-based  
478 modeling, reconstruction, and prediction for COVID-19 outbreaks in Hungary caused by  
479 highly immune evasive variants. *Water Res*. 2023 Aug 1;241:120098.
- 480 48. Proverbio D, Kemp F, Magni S, Ogorzaly L, Cauchie HM, Gonçalves J, et al. Model-based  
481 assessment of COVID-19 epidemic dynamics by wastewater analysis. *Sci Total Environ*.  
482 2022 Jun 25;827:154235.
- 483 49. Wölfel R, Corman VM, Guggemos W, Seilmaier M, Zange S, Müller MA, et al. Virological  
484 assessment of hospitalized patients with COVID-2019. *Nature*. 2020 May;581(7809):465–9.
- 485 50. Rose C, Parker A, Jefferson B, Cartmell E. The characterization of feces and urine: A review  
486 of the literature to inform advanced treatment technology. *Crit Rev Environ Sci Technol*.  
487 2015 Sep 2;45(17):1827–79.





489 **Table 1: Site characteristics and outbreak detection from the wastewater data and**  
 490 **clinically confirmed cases.** Start of outbreaks was measured using a Piecewise regression  
 491 model.

| City | City census* | ZIP Code population* | Outbreak Start WW | Outbreak Start Cases | Δ Outbreak Start (Day) | Fold change in SARS-CoV-2 |
|------|--------------|----------------------|-------------------|----------------------|------------------------|---------------------------|
| SC   | 25,435       | 26,739               | 2022-01-04        | 2022-01-11           | 7                      | 7.4                       |
| R1   | 1,030        | 1,701                | 2022-01-06        | 2022-01-13           | 7                      | 15.2                      |
| R2   | 763+196†     | 2,115                | 2022-01-01        | 2022-01-11           | 10                     | 53.9                      |
| R3   | 890          | 2,015                | 2022-01-14        | 2022-01-16           | 2                      | 21.7                      |
| R4   | 624          | 1,167                | 2022-01-05        | 2022-01-09           | 4                      | 42.5                      |
| R5   | 288          | 985                  | 2022-01-12        | 2022-01-12           | 0                      | 81.2                      |

\* Data from the 2020 Decennial Census obtained from <https://data.census.gov/>

† Wastewater treatment facility collects effluents from a second city.

492

493

494 **Table 2: Parameters used in model fitting.**

| Parameter | Description                                   | Value                               | Reference                   |
|-----------|-----------------------------------------------|-------------------------------------|-----------------------------|
| $E_v$     | Mean virus copies shed by a single individual | $4.49 \times 10^7$ gc/l             | (8)                         |
| $V_v$     | Variance of virus shed by individuals         | $2 \times 10^7$ (gc/l) <sup>2</sup> | (49)                        |
| $\tau$    | Incubation period                             | 3 days                              | (8)                         |
| $\delta$  | Infectious period                             | 8 days                              | (8)                         |
| $\beta$   | Force of infection                            | Fit from data                       |                             |
| $Q$       | Flow rate of sewershed                        | Various                             | Individual treatment plants |
|           | Average faeces produced per day               | 128 g                               | (50)                        |

495

496 **FIGURE LEGENDS**

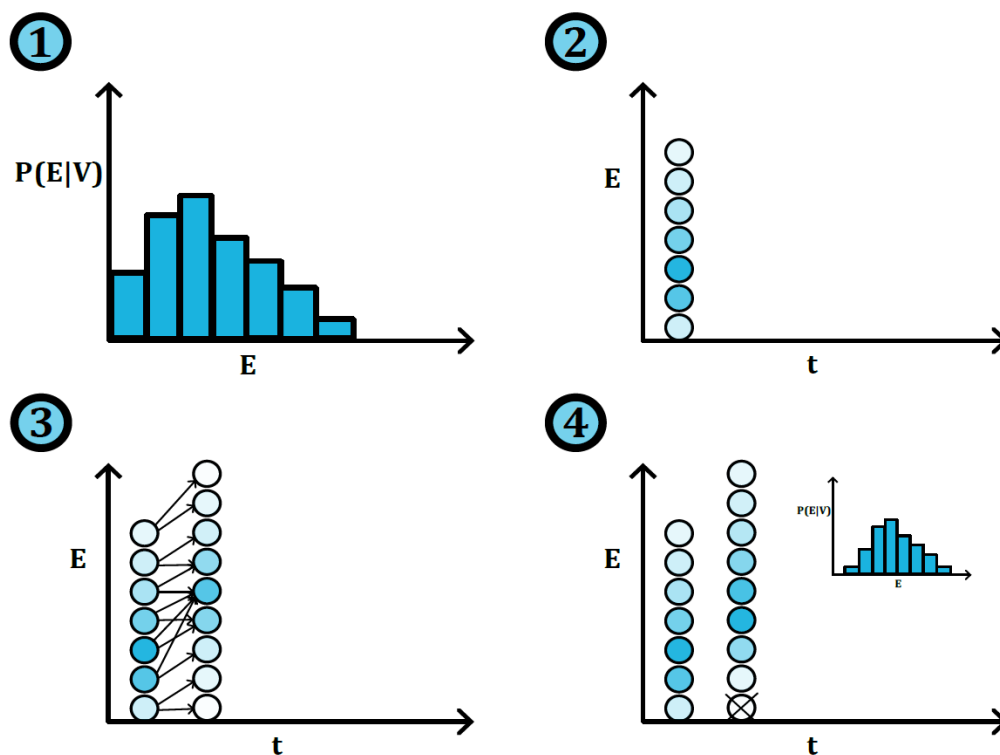

497

498 **Figure 1: Diagram showing steps of the particle filter method we use to determine the**  
499 **number of active cases from the wastewater titers of SARS-CoV-2.** The particle filter is  
500 initialized using the first measurement of virus concentration in the wastewater. We generate a  
501 distribution of the possible number of infections in the community and sample many (50000)  
502 values from this distribution. These values are used as the possible number of exposed  
503 individuals ( $E$ ) on day 1 (top right graph). Each of these values also gets a potential number of  
504 Susceptible ( $S$ ), Infected ( $I$ ), and Recovered ( $R$ ) individuals. Each set of values ( $S, E, I, R$ ) is called  
505 a particle. The darker dots in the diagram signify a higher number of particles with that value of  
506  $E$ . We apply one step of the stochastic  $SEIR$  model to each particle to predict the number of  
507 infections on the next day (bottom left graph). The measurement of the virus in the wastewater  
508 on the next measurement is used to determine which particles are more likely than others. Less

509 likely particles are filtered out using a systematic resampling procedure and replaced with more  
510 likely particles (bottom right graph).

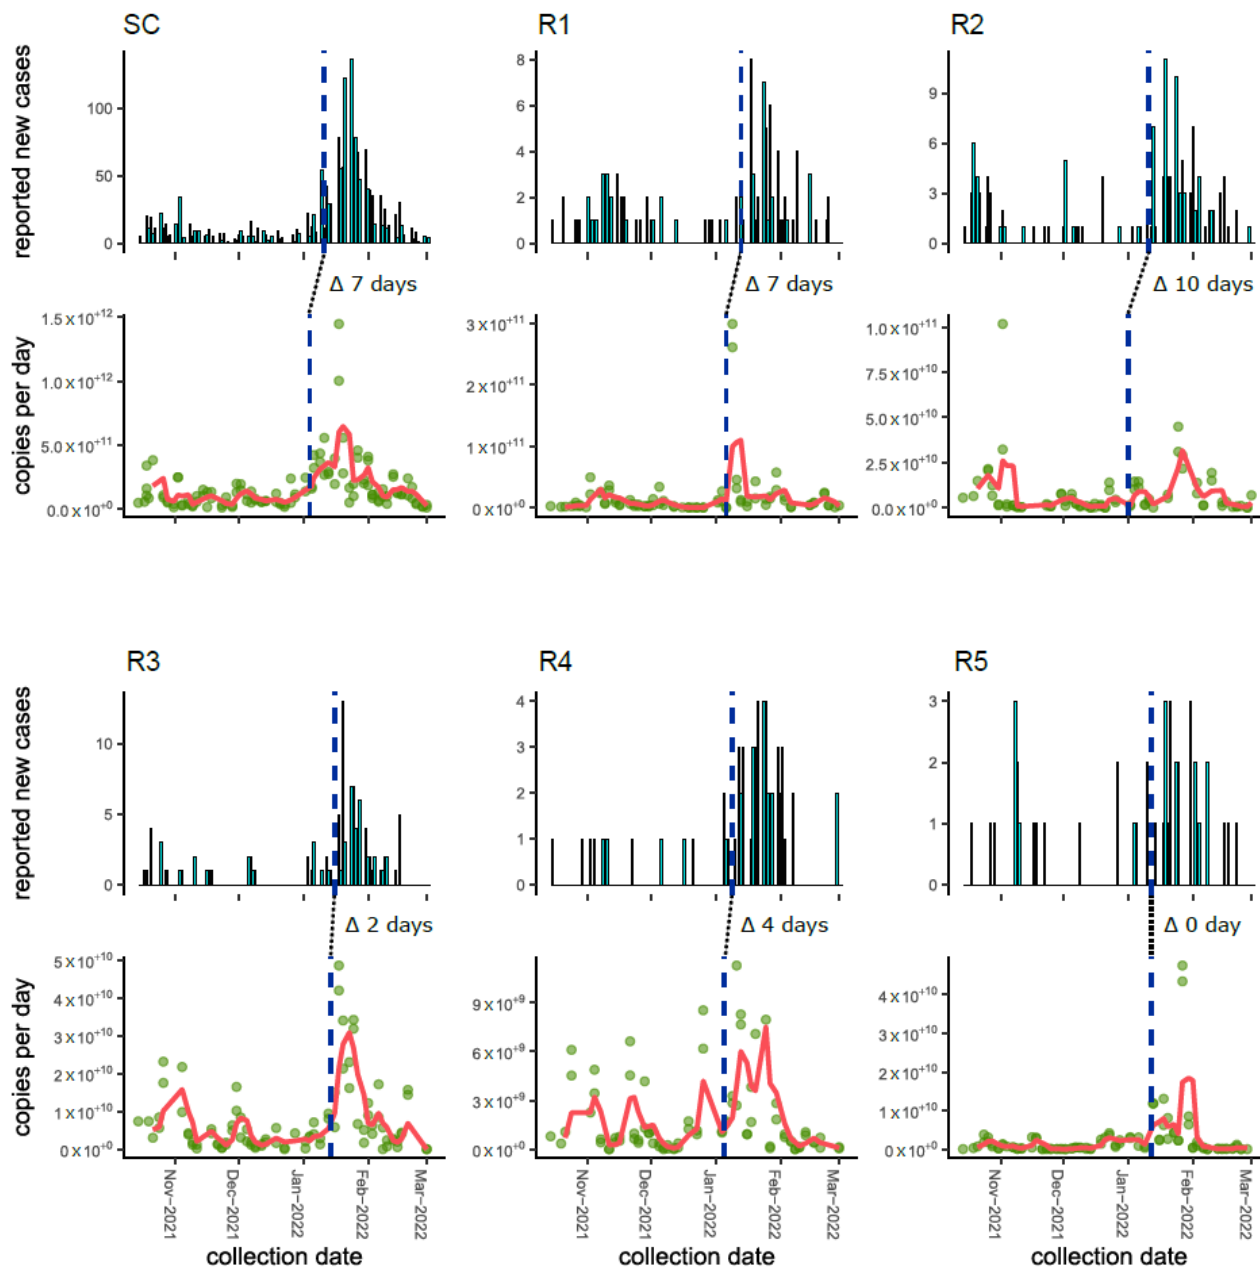

511  
512 **Figure 2: Trend in SARS-CoV-2 in wastewater mirrors the dynamic of the COVID-19**  
513 **outbreak in rural areas.** Each panel represents a city. In each panel, the bar graph shows the  
514 time series of the COVID-19 clinically confirmed cases at the specimen collection dates and the

515 second graph shows the measured concentration of SARS-CoV-2 (green dots) with the 7-day  
516 moving average (red line). Vertical dash lines represent the estimated start of the outbreak using  
517 either the cumulative sum of the copies per day of the N1 target or the cumulative sum of  
518 COVID-19 clinically confirmed cases, determined by the Piecewise regression model. Delta  
519 shows the difference of days between predicted dates from wastewater-based detection of SARS-  
520 CoV-2 and clinically confirmed COVID-19 cases. Cities are ordered by population size (largest  
521 on the top left and smallest on the bottom right).

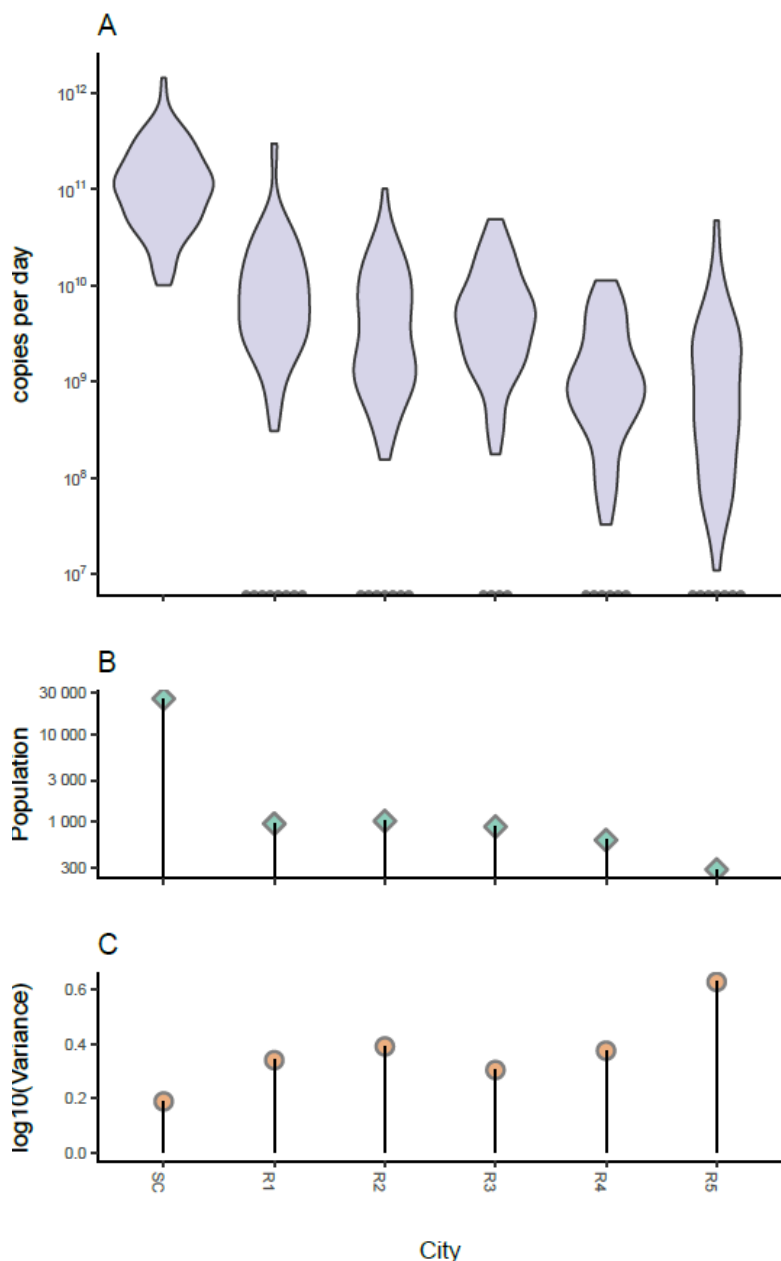

522  
523 **Figure 3: Daily quantities of SARS-CoV-2 tend to be more spread as the city population get**  
524 **smaller.** Panel A) shows the distribution of the copies per day of the SARS-CoV-2 on the log  
525 scale over the sampling period at each site ordered by city size, detailed in panel B. Note: bin  
526 width = 1/30. Dots on the x axis show the samples where N1 was under the detection limit (SC:  
527 n = 0, R1: n = 8, R2: n = 8, R3: n = 4, R4: n = 6, R5: n = 7). Panels B) shows the population size  
528 of the cities sampled, and C) shows the log scale sample variance measured for each city

529 calculated using the log10 of copies per day of the SARS-CoV-2. This essentially shows that the  
530 magnitude of the estimate is less consistent as population size gets smaller (i.e., more  
531 stochasticity).

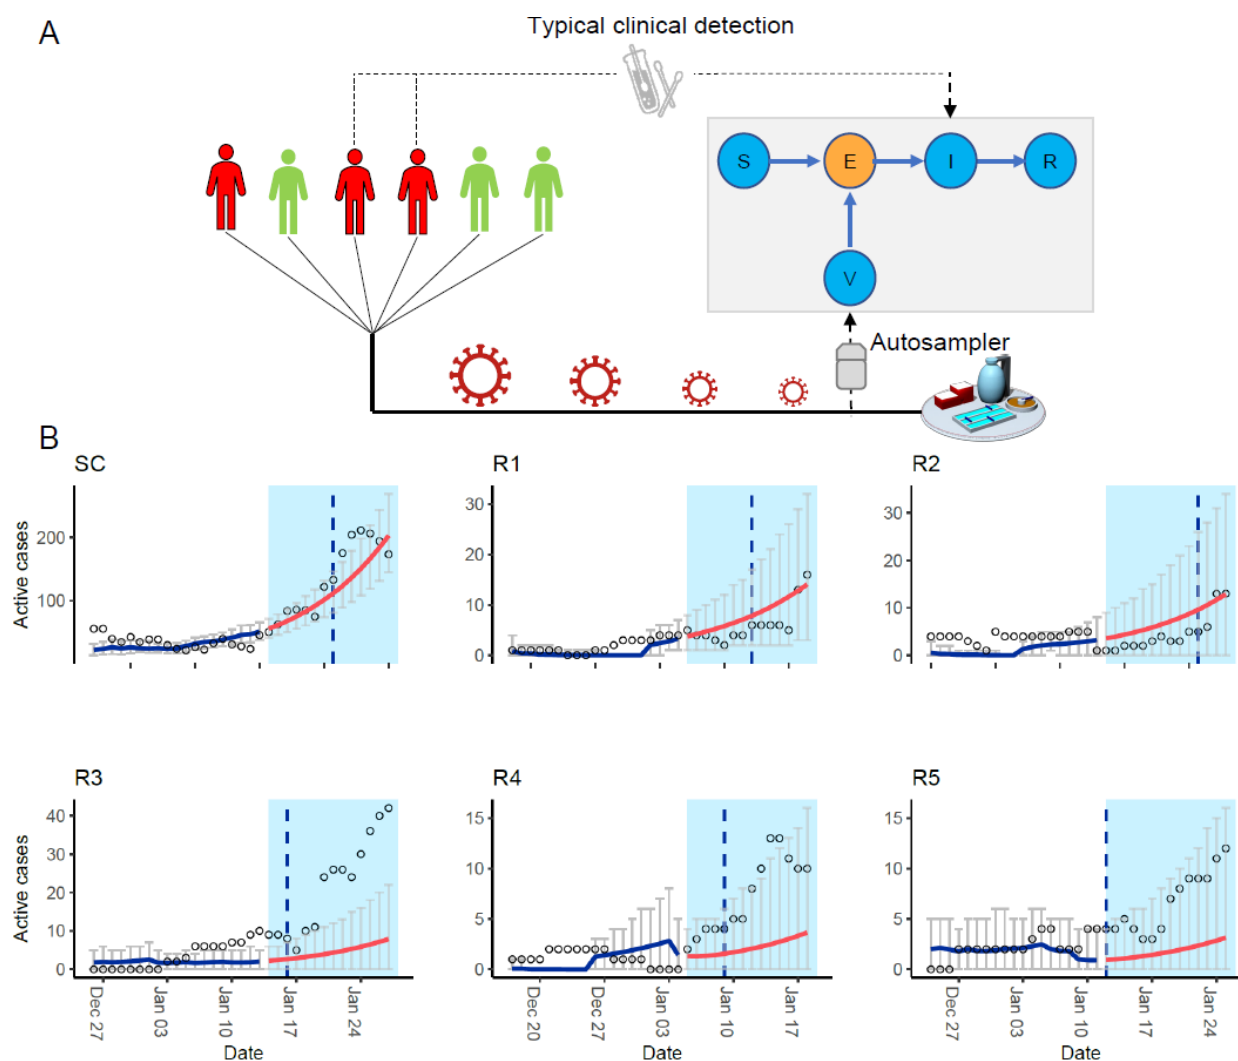

532  
533 **Figure 4: Susceptible-exposed-infectious-recovered model can forecast cases in the early**  
534 **stage of a COVID-19 outbreak. A) SEIR model framework depicting a population in green**  
535 **with infected people in red. The SARS-CoV-2 shed by a fraction of the exposed population is**  
536 **measured in the wastewater collected at the WWTF. This titer is integrated into a Susceptible**  
537 **(S), Exposed (E), Infected (I), and Recovered (R) model to estimate the number of exposed**

538 individuals E. **B)** Left white side contains known data at the time of the forecast where the blue  
539 lines show the fitted predicted active cases from wastewater up to the beginning of the outbreak,  
540 and the blue shade shows the data not yet observed at the time of forecast whereas the red lines  
541 are active cases forecasted. Vertical dashed lines represent the estimated start of the outbreak  
542 based on clinically confirmed COVID-19 cases. Using the wastewater data, the model forecasted  
543 the start of the outbreak between 0 to 11 days earlier than the onset of the increase in clinical  
544 confirmed cases. 95% confidence intervals are shown by the gray bars. Dots show the active  
545 cases determined as the 11-day moving sum of the clinically confirmed cases. Since the mean  
546 infectious period from fitting data was 10.88 days, we determined the actual active cases as the  
547 11-day moving sum of new clinically confirmed cases. Breakpoints between fitted and forecast  
548 values were chosen to be two days after the start of the outbreak, determined by the Piecewise  
549 regression model. Cities are ordered by population size (largest on the top left and smallest on  
550 the bottom right).

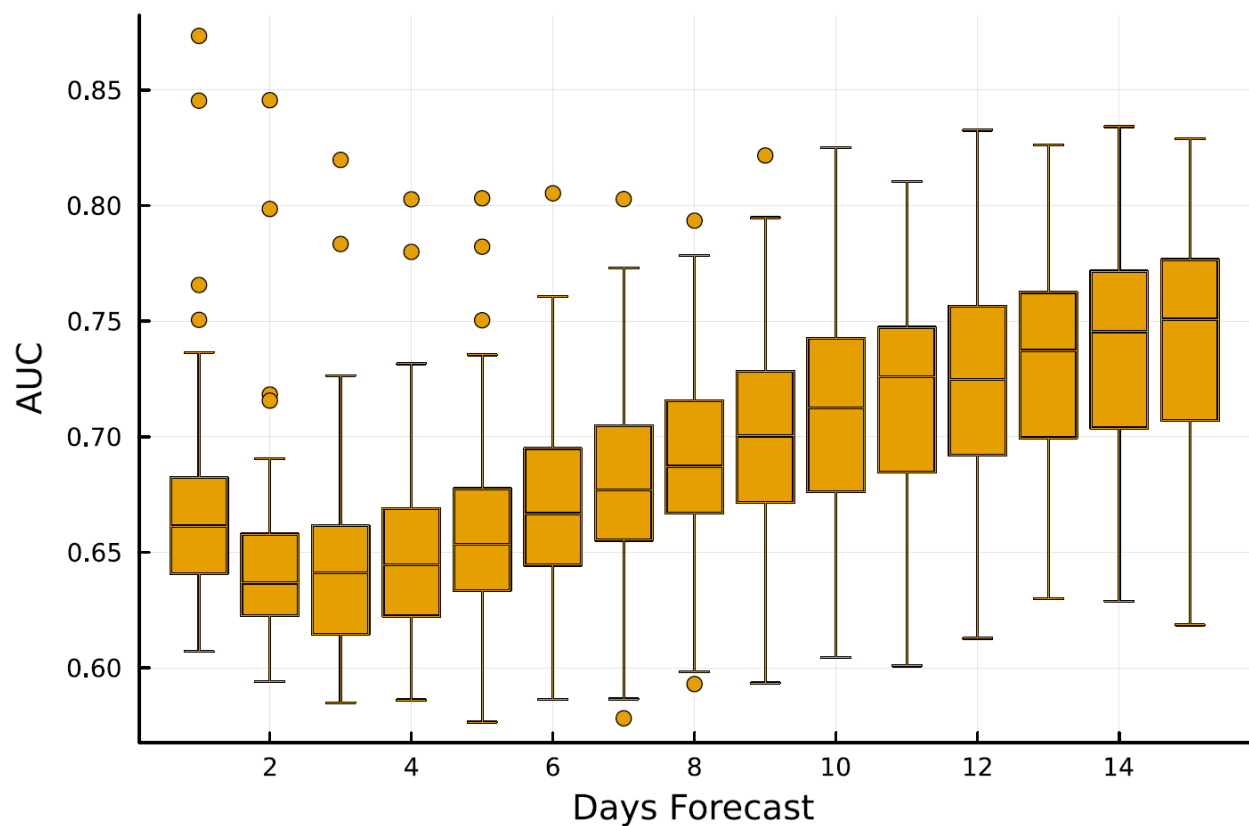

551

552 **Figure 5: Receiver operating characteristic (ROC) curves for a synthetic data set.** A plot  
553 showing the number of true increases against false increases for predicted case counts  
554 1,3,5,7,9,11,13, and 15 days beyond the current measurements. A true increase is counted when  
555 there was an increase in cases and the model predicted a greater than  $\alpha$  probability of an  
556 increase. A false increase is counted when there was no increase in cases but the model predicted  
557 a greater than  $\alpha$  probability of increase.



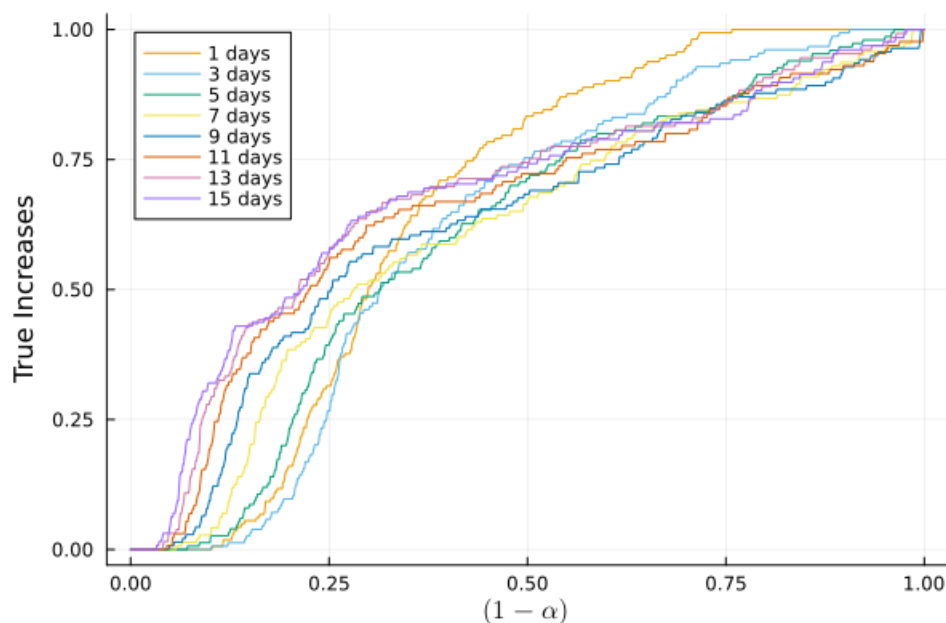

558

559 **Figure 6: Evaluating SEIR model predictability for an emerging COVID-19 outbreak.** Box

560 plot showing the distribution of measured area under the curve (AUC) when computing 50

561 receiver operating characteristic (ROC) curves when true positive rate is plotted as function of

562 the false positive rate for prediction forecasted from one to 15 days. A random classifier, which

563 represents the outcome if the model randomly picks predictions, has an AUC of 0.5. The further

564 away the curve is from the one of the random classifier, the higher the AUC and the better it

565 illustrates the ability of the model to forecast a trend, with the 1 representing the highest

566 accuracy corresponding to 100% positive rate and 0% false negatives. In general, for a

567 diagnostic test to be able to discriminate patients with and without a disease, the AUC must be

568 above 0.5. Values between 0.7 and 0.8 are considered to be 'fair' or acceptable (34,35).
