# Supplementary material for: Epidemiological model can forecast COVID-19 outbreaks from wastewater-based surveillance in rural communities
Source: bioRxiv or medRxiv preprint supplement (doi:10.1101/2024.02.01.24302131), 2024-02-03
Supplement: Supplementary file [file media-1.pdf]

1 **Supplementary materials**

2 **Epidemiological model can forecast COVID-19 outbreaks from wastewater-based**  
3 **surveillance in rural communities.**

4 Tyler Meadows, Erik R. Coats, Solana Narum, Eva Top, Benjamin J. Ridenhour, Thibault  
5 Stalder

6  
7 **Variance analysis**

8 We tested if the variance of the total copies of SARS-CoV-2 collected per day at the wastewater  
9 treatment facilities, referred to below as “copies\_per\_day”, was different between cities referred  
10 to below as “location”.

11 Results from test when testing copies\_per\_day ~ location

12 **A) Brown-Forsythe Test (alpha = 0.05)**

13 -----  
14 data : copies\_per\_day and location  
15  
16 statistic : 69.33715  
17 num df : 5  
18 denom df : 129.2721  
19 p.value : 6.511297e-35  
20  
21 Result : Difference is statistically significant.  
22 -----

23 **B) Levene's Test for Homogeneity of Variance (center = median)**

24 Df F value Pr(>F)  
25 group 5 27.797 < 2.2e-16 \*\*\*  
26 503  
27 ---  
28 Signif. codes: 0 '\*\*\*' 0.001 '\*\*' 0.01  
29

30 **C) Bartlett test of homogeneity of variances**

31 '\*' 0.05 '.' 0.1 ' ' 1  
32  
33 data: copies\_per\_day by location  
34 Bartlett's K-squared = 1560, df = 5, p-value < 2.2e-16  
35

36 **D) Fligner-Killeen test of homogeneity of variances**

37 data: copies\_per\_day by location  
38 Fligner-Killeen:med chi-squared = 307.03, df = 5, p-value < 2.2e-16  
39

40 **Comparisons of the AUC**

41 Simultaneous Tests for General Linear Hypotheses

42

43 Multiple Comparisons of Means: Tukey Contrasts

44

45

46 Fit: glmer(formula = AUC ~ Day + (1 | run\_ID), data = AUC\_Data, family = gaus  
47 sian(link = make.link("logit"))

48

49 Linear Hypotheses:

|     |             | Estimate  | Std. Error | z value | Pr(> z ) |     |
|-----|-------------|-----------|------------|---------|----------|-----|
| 50  |             |           |            |         |          |     |
| 51  | 2 - 1 == 0  | -0.104736 | 0.023831   | -4.395  | <0.01    | **  |
| 52  | 3 - 1 == 0  | -0.119183 | 0.023777   | -5.013  | <0.01    | *** |
| 53  | 4 - 1 == 0  | -0.093857 | 0.023854   | -3.935  | <0.01    | **  |
| 54  | 5 - 1 == 0  | -0.048525 | 0.024002   | -2.022  | 0.7852   |     |
| 55  | 6 - 1 == 0  | -0.004944 | 0.024168   | -0.205  | 1.0000   |     |
| 56  | 7 - 1 == 0  | 0.046541  | 0.024376   | 1.909   | 0.8484   |     |
| 57  | 8 - 1 == 0  | 0.090456  | 0.024575   | 3.681   | 0.0189   | *   |
| 58  | 9 - 1 == 0  | 0.135982  | 0.024787   | 5.486   | <0.01    | *** |
| 59  | 10 - 1 == 0 | 0.173965  | 0.024987   | 6.962   | <0.01    | *** |
| 60  | 11 - 1 == 0 | 0.206515  | 0.025172   | 8.204   | <0.01    | *** |
| 61  | 12 - 1 == 0 | 0.245328  | 0.025392   | 9.662   | <0.01    | *** |
| 62  | 13 - 1 == 0 | 0.286689  | 0.025656   | 11.174  | <0.01    | *** |
| 63  | 14 - 1 == 0 | 0.314903  | 0.025840   | 12.187  | <0.01    | *** |
| 64  | 15 - 1 == 0 | 0.331965  | 0.025964   | 12.785  | <0.01    | *** |
| 65  | 3 - 2 == 0  | -0.014447 | 0.023379   | -0.618  | 1.0000   |     |
| 66  | 4 - 2 == 0  | 0.010879  | 0.023458   | 0.464   | 1.0000   |     |
| 67  | 5 - 2 == 0  | 0.056211  | 0.023608   | 2.381   | 0.5290   |     |
| 68  | 6 - 2 == 0  | 0.099792  | 0.023776   | 4.197   | <0.01    | **  |
| 69  | 7 - 2 == 0  | 0.151276  | 0.023987   | 6.307   | <0.01    | *** |
| 70  | 8 - 2 == 0  | 0.195191  | 0.024190   | 8.069   | <0.01    | *** |
| 71  | 9 - 2 == 0  | 0.240718  | 0.024405   | 9.863   | <0.01    | *** |
| 72  | 10 - 2 == 0 | 0.278701  | 0.024608   | 11.326  | <0.01    | *** |
| 73  | 11 - 2 == 0 | 0.311251  | 0.024796   | 12.552  | <0.01    | *** |
| 74  | 12 - 2 == 0 | 0.350064  | 0.025019   | 13.992  | <0.01    | *** |
| 75  | 13 - 2 == 0 | 0.391424  | 0.025287   | 15.479  | <0.01    | *** |
| 76  | 14 - 2 == 0 | 0.419639  | 0.025474   | 16.474  | <0.01    | *** |
| 77  | 15 - 2 == 0 | 0.436701  | 0.025599   | 17.059  | <0.01    | *** |
| 78  | 4 - 3 == 0  | 0.025326  | 0.023401   | 1.082   | 0.9991   |     |
| 79  | 5 - 3 == 0  | 0.070658  | 0.023552   | 3.000   | 0.1523   |     |
| 80  | 6 - 3 == 0  | 0.114239  | 0.023720   | 4.816   | <0.01    | *** |
| 81  | 7 - 3 == 0  | 0.165723  | 0.023932   | 6.925   | <0.01    | *** |
| 82  | 8 - 3 == 0  | 0.209638  | 0.024134   | 8.686   | <0.01    | *** |
| 83  | 9 - 3 == 0  | 0.255165  | 0.024351   | 10.479  | <0.01    | *** |
| 84  | 10 - 3 == 0 | 0.293148  | 0.024554   | 11.939  | <0.01    | *** |
| 85  | 11 - 3 == 0 | 0.325698  | 0.024742   | 13.164  | <0.01    | *** |
| 86  | 12 - 3 == 0 | 0.364511  | 0.024965   | 14.601  | <0.01    | *** |
| 87  | 13 - 3 == 0 | 0.405871  | 0.025234   | 16.084  | <0.01    | *** |
| 88  | 14 - 3 == 0 | 0.434086  | 0.025421   | 17.076  | <0.01    | *** |
| 89  | 15 - 3 == 0 | 0.451148  | 0.025547   | 17.659  | <0.01    | *** |
| 90  | 5 - 4 == 0  | 0.045332  | 0.023629   | 1.918   | 0.8436   |     |
| 91  | 6 - 4 == 0  | 0.088913  | 0.023797   | 3.736   | 0.0158   | *   |
| 92  | 7 - 4 == 0  | 0.140398  | 0.024008   | 5.848   | <0.01    | *** |
| 93  | 8 - 4 == 0  | 0.184312  | 0.024210   | 7.613   | <0.01    | *** |
| 94  | 9 - 4 == 0  | 0.229839  | 0.024426   | 9.410   | <0.01    | *** |
| 95  | 10 - 4 == 0 | 0.267822  | 0.024628   | 10.875  | <0.01    | *** |
| 96  | 11 - 4 == 0 | 0.300372  | 0.024816   | 12.104  | <0.01    | *** |
| 97  | 12 - 4 == 0 | 0.339185  | 0.025038   | 13.547  | <0.01    | *** |
| 98  | 13 - 4 == 0 | 0.380545  | 0.025306   | 15.038  | <0.01    | *** |
| 99  | 14 - 4 == 0 | 0.408760  | 0.025493   | 16.034  | <0.01    | *** |
| 100 | 15 - 4 == 0 | 0.425822  | 0.025619   | 16.622  | <0.01    | *** |
| 101 | 6 - 5 == 0  | 0.043581  | 0.023945   | 1.820   | 0.8902   |     |
| 102 | 7 - 5 == 0  | 0.095066  | 0.024154   | 3.936   | <0.01    | **  |

|     |                                                               |          |          |        |        |     |
|-----|---------------------------------------------------------------|----------|----------|--------|--------|-----|
| 103 | 8 - 5 == 0                                                    | 0.138980 | 0.024355 | 5.706  | <0.01  | *** |
| 104 | 9 - 5 == 0                                                    | 0.184507 | 0.024569 | 7.510  | <0.01  | *** |
| 105 | 10 - 5 == 0                                                   | 0.222490 | 0.024770 | 8.982  | <0.01  | *** |
| 106 | 11 - 5 == 0                                                   | 0.255040 | 0.024957 | 10.219 | <0.01  | *** |
| 107 | 12 - 5 == 0                                                   | 0.293853 | 0.025178 | 11.671 | <0.01  | *** |
| 108 | 13 - 5 == 0                                                   | 0.335213 | 0.025444 | 13.174 | <0.01  | *** |
| 109 | 14 - 5 == 0                                                   | 0.363428 | 0.025630 | 14.180 | <0.01  | *** |
| 110 | 15 - 5 == 0                                                   | 0.380490 | 0.025755 | 14.773 | <0.01  | *** |
| 111 | 7 - 6 == 0                                                    | 0.051485 | 0.024318 | 2.117  | 0.7230 |     |
| 112 | 8 - 6 == 0                                                    | 0.095400 | 0.024517 | 3.891  | <0.01  | **  |
| 113 | 9 - 6 == 0                                                    | 0.140926 | 0.024729 | 5.699  | <0.01  | *** |
| 114 | 10 - 6 == 0                                                   | 0.178909 | 0.024929 | 7.177  | <0.01  | *** |
| 115 | 11 - 6 == 0                                                   | 0.211459 | 0.025115 | 8.420  | <0.01  | *** |
| 116 | 12 - 6 == 0                                                   | 0.250272 | 0.025334 | 9.879  | <0.01  | *** |
| 117 | 13 - 6 == 0                                                   | 0.291633 | 0.025599 | 11.392 | <0.01  | *** |
| 118 | 14 - 6 == 0                                                   | 0.319847 | 0.025783 | 12.405 | <0.01  | *** |
| 119 | 15 - 6 == 0                                                   | 0.336909 | 0.025907 | 13.004 | <0.01  | *** |
| 120 | 8 - 7 == 0                                                    | 0.043915 | 0.024721 | 1.776  | 0.9075 |     |
| 121 | 9 - 7 == 0                                                    | 0.089442 | 0.024932 | 3.587  | 0.0261 | *   |
| 122 | 10 - 7 == 0                                                   | 0.127424 | 0.025130 | 5.071  | <0.01  | *** |
| 123 | 11 - 7 == 0                                                   | 0.159974 | 0.025314 | 6.320  | <0.01  | *** |
| 124 | 12 - 7 == 0                                                   | 0.198787 | 0.025532 | 7.786  | <0.01  | *** |
| 125 | 13 - 7 == 0                                                   | 0.240148 | 0.025794 | 9.310  | <0.01  | *** |
| 126 | 14 - 7 == 0                                                   | 0.268363 | 0.025977 | 10.331 | <0.01  | *** |
| 127 | 15 - 7 == 0                                                   | 0.285425 | 0.026100 | 10.936 | <0.01  | *** |
| 128 | 9 - 8 == 0                                                    | 0.045527 | 0.025126 | 1.812  | 0.8937 |     |
| 129 | 10 - 8 == 0                                                   | 0.083510 | 0.025322 | 3.298  | 0.0659 | .   |
| 130 | 11 - 8 == 0                                                   | 0.116059 | 0.025505 | 4.550  | <0.01  | *** |
| 131 | 12 - 8 == 0                                                   | 0.154872 | 0.025721 | 6.021  | <0.01  | *** |
| 132 | 13 - 8 == 0                                                   | 0.196233 | 0.025981 | 7.553  | <0.01  | *** |
| 133 | 14 - 8 == 0                                                   | 0.224448 | 0.026163 | 8.579  | <0.01  | *** |
| 134 | 15 - 8 == 0                                                   | 0.241510 | 0.026285 | 9.188  | <0.01  | *** |
| 135 | 10 - 9 == 0                                                   | 0.037983 | 0.025527 | 1.488  | 0.9780 |     |
| 136 | 11 - 9 == 0                                                   | 0.070533 | 0.025709 | 2.744  | 0.2771 |     |
| 137 | 12 - 9 == 0                                                   | 0.109346 | 0.025923 | 4.218  | <0.01  | **  |
| 138 | 13 - 9 == 0                                                   | 0.150706 | 0.026181 | 5.756  | <0.01  | *** |
| 139 | 14 - 9 == 0                                                   | 0.178921 | 0.026361 | 6.787  | <0.01  | *** |
| 140 | 15 - 9 == 0                                                   | 0.195983 | 0.026483 | 7.400  | <0.01  | *** |
| 141 | 11 - 10 == 0                                                  | 0.032550 | 0.025900 | 1.257  | 0.9956 |     |
| 142 | 12 - 10 == 0                                                  | 0.071363 | 0.026113 | 2.733  | 0.2832 |     |
| 143 | 13 - 10 == 0                                                  | 0.112723 | 0.026369 | 4.275  | <0.01  | **  |
| 144 | 14 - 10 == 0                                                  | 0.140938 | 0.026548 | 5.309  | <0.01  | *** |
| 145 | 15 - 10 == 0                                                  | 0.158000 | 0.026668 | 5.925  | <0.01  | *** |
| 146 | 12 - 11 == 0                                                  | 0.038813 | 0.026289 | 1.476  | 0.9793 |     |
| 147 | 13 - 11 == 0                                                  | 0.080174 | 0.026544 | 3.020  | 0.1438 |     |
| 148 | 14 - 11 == 0                                                  | 0.108388 | 0.026721 | 4.056  | <0.01  | **  |
| 149 | 15 - 11 == 0                                                  | 0.125450 | 0.026840 | 4.674  | <0.01  | *** |
| 150 | 13 - 12 == 0                                                  | 0.041361 | 0.026751 | 1.546  | 0.9694 |     |
| 151 | 14 - 12 == 0                                                  | 0.069575 | 0.026927 | 2.584  | 0.3798 |     |
| 152 | 15 - 12 == 0                                                  | 0.086637 | 0.027046 | 3.203  | 0.0866 | .   |
| 153 | 14 - 13 == 0                                                  | 0.028215 | 0.027175 | 1.038  | 0.9994 |     |
| 154 | 15 - 13 == 0                                                  | 0.045277 | 0.027293 | 1.659  | 0.9448 |     |
| 155 | 15 - 14 == 0                                                  | 0.017062 | 0.027465 | 0.621  | 1.0000 |     |
| 156 | ---                                                           |          |          |        |        |     |
| 157 | Signif. codes: 0 '***' 0.001 '**' 0.01 '*' 0.05 '.' 0.1 ' ' 1 |          |          |        |        |     |
| 158 | (Adjusted p values reported -- single-step method)            |          |          |        |        |     |
| 159 |                                                               |          |          |        |        |     |

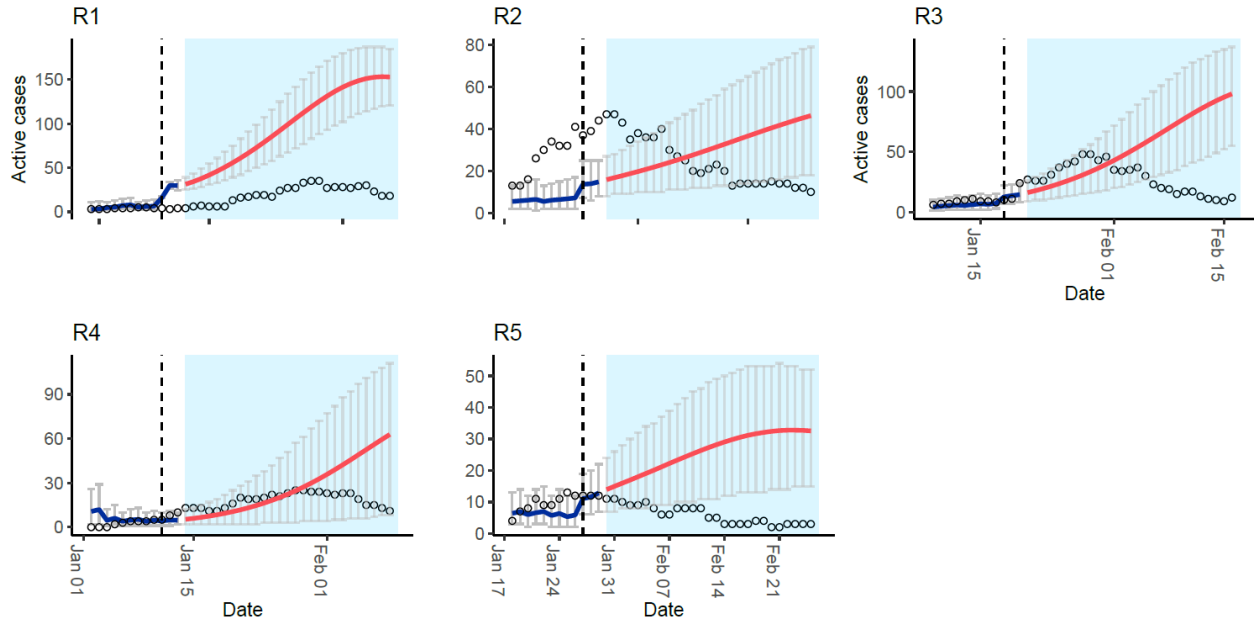

160

161 **Figure S1: Outbreak peak forecast.** The red line in the graph represents the predicted number  
 162 of active cases of SARS-CoV-2 in wastewater. This prediction was made at a time when the  
 163 virus levels in wastewater were starting to decrease and corresponded to two days after the peak  
 164 of SARS-CoV-2 in wastewater, which is indicated by the vertical dashed lines. The blue lines in  
 165 the graph show the estimated number of active cases based on the wastewater data, and the blue  
 166 shade represents the data that was not yet observed at the time of the forecast. Based on the  
 167 wastewater data the model failed to predict the outbreak peak accurately. The gray bars indicate  
 168 the 95% confidence intervals. The dots in the graph represent the number of active cases, which  
 169 were determined using a moving sum of the clinically confirmed cases over an 11-day period.
